# Supplementary material
Source: PubMed Central journal article supplement (PMC7205692)
Supplement: mmc2.pdf [file mmc2.pdf]

Table S1. Related to Figure 1. Description of all scRNA-seq datasets used in this study.

| <b>Dataset</b>                  | <b>Citation</b>                                                                                                                   | <b>GEO/SRA access number</b> | <b>Description of the experiment</b>                                                                                                                                          |
|---------------------------------|-----------------------------------------------------------------------------------------------------------------------------------|------------------------------|-------------------------------------------------------------------------------------------------------------------------------------------------------------------------------|
| <b>Mouse Influenza A</b>        | <a href="https://www.ncbi.nlm.nih.gov/pubmed/29886109">https://www.ncbi.nlm.nih.gov/pubmed/29886109</a>                           | GSE126042 / SRP126257        | Intranasal infection of mouse lung by PR8 H1N1 Influenza A strain. Immune and non immune cells are sequenced 48 or 72h post infection using MARS-seq technology.              |
| <b>Spleen LCMV (NICHE-seq)</b>  | <a href="https://science.sciencemag.org/content/358/6370/1622.long">https://science.sciencemag.org/content/358/6370/1622.long</a> | GSE104054 / SRP118316        | Mice receive LCMV injection in the footpad. 72h later, spleen is harvested and cells from the different spleen regions are sequenced using the NICHE-seq/MARS-seq technology. |
| <b>Lymph Node LCMV/VSV</b>      | NA                                                                                                                                | NA                           | Intradermal infection by LCMV and VSV near the ear pinna. Immune non B/T cells from the draining lymph node are sequenced 24h later using MARS-seq technology.                |
| <b>In vitro HSV-1 infection</b> | <a href="https://elifesciences.org/articles/46339">https://elifesciences.org/articles/46339</a>                                   | GSE126042 / SRP183453        | Human fibroblasts were infected in vitro by HSV-1 (Strain 17) and sequenced 5h later using the DROP-seq technology.                                                           |
| <b>In vitro HIV infection</b>   | <a href="https://www.ncbi.nlm.nih.gov/pmc/articles/PMC6258175/">https://www.ncbi.nlm.nih.gov/pmc/articles/PMC6258175/</a>         | NA / SRP134859               | In vitro infection of human CD4+ T cells by HIV and sequenced 12 weeks post infection by 10X Genomics technology.                                                             |

|                          |                                                                                                                                           |           |                                                                                                                              |
|--------------------------|-------------------------------------------------------------------------------------------------------------------------------------------|-----------|------------------------------------------------------------------------------------------------------------------------------|
| <b>COVID-19 patients</b> | <a href="https://www.medrxiv.org/content/10.1101/2020.02.23.20026690v1">https://www.medrxiv.org/content/10.1101/2020.02.23.20026690v1</a> | GSE145926 | Broncho Alveolar Lavage of mild and severe COVID-19 patients. Whole cell content is sequenced using 10X Genomics technology. |
| <b>HBV patients</b>      | NA                                                                                                                                        | GSE145926 | Liver biopsy from an acute HBV patient. Whole cell content is sequenced using 10X Genomics technology                        |

Table S2. Related to Figure 4.

Enrichment of SARS-CoV-2 UMI in different populations across the six severe patients (S1-S6). Values represent subset log2 between observed and expected viral UMI per patient.

|                                                          | S1    | S2    | S3    | S4    | S5    | S6    |
|----------------------------------------------------------|-------|-------|-------|-------|-------|-------|
| Neutrophils                                              | -0.32 | -0.14 | -1.55 | -0.25 | -0.01 | 0.00  |
| Alveolar Macrophages                                     | -0.06 | -0.72 | -0.13 | NA    | -0.01 | -0.01 |
| Alveolar Macrophages (MARCO <sup>lo</sup> )              | -0.04 | -0.64 | -0.07 | -0.04 | 0.00  | -0.17 |
| Mon-derived mac (SPP1 <sup>hi</sup> C1QA <sup>lo</sup> ) | -0.56 | -0.24 | 0.47  | 0.73  | -0.06 | -0.07 |
| Mon-derived mac (SPP1 <sup>hi</sup> C1QA <sup>hi</sup> ) | 1.72  | 0.35  | -0.34 | 0.87  | -0.08 | -0.15 |
| Mon-derived mac (IL1B <sup>hi</sup> )                    | -0.79 | -0.16 | -0.67 | -0.18 | 0.05  | -0.73 |
| Monocytes I                                              | -1.28 | 0.88  | -0.87 | -0.15 | -0.02 | -0.07 |
| Monocytes II                                             | -1.36 | -1.56 | -0.28 | 0.32  | -0.05 | -0.05 |
| Monocytes (IFNA <sup>hi</sup> )                          | -0.10 | -0.02 | NA    | NA    | NA    | NA    |
| DC                                                       | -0.13 | -1.55 | -0.27 | -0.01 | -0.01 | -0.01 |
| Plasmacytoid DC (pDC)                                    | 0.23  | 2.39  | NA    | NA    | NA    | NA    |
| Mast cells                                               | -0.01 | -0.03 | NA    | -0.11 | -0.01 | 0.00  |
| CD4 <sup>+</sup> T cells                                 | -0.37 | -0.69 | -0.45 | -0.01 | -0.01 | -0.10 |
| Naive CD4 <sup>+</sup> T cells (CCR7 <sup>hi</sup> )     | -0.45 | -0.29 | 1.24  | -0.02 | -0.16 | -0.02 |
| T <sub>regs</sub>                                        | -0.06 | -0.10 | NA    | NA    | 0.00  | -0.01 |
| T <sub>fh</sub>                                          | -0.14 | -0.14 | -0.11 | NA    | 0.00  | 0.00  |
| Effector CD8 <sup>+</sup> T cells                        | -0.30 | -0.80 | -0.11 | -0.02 | -0.10 | -0.12 |
| CD8 <sup>+</sup> T <sub>rm</sub> (ZNF683 <sup>hi</sup> ) | -0.09 | 1.00  | -0.44 | 0.00  | -0.02 | -0.02 |
| Cytotoxic CD8 <sup>+</sup> T cells                       | -0.29 | -0.73 | -0.57 | -0.12 | -0.03 | -0.12 |
| NK cells                                                 | -0.43 | -0.20 | -0.07 | -0.10 | -0.01 | -0.03 |
| B cells                                                  | -0.02 | -0.21 | -0.32 | -0.01 | -0.02 | -0.01 |
| Epithelial progenitors                                   | -0.02 | 0.30  | 1.12  | -0.33 | 0.00  | -0.01 |
| Ciliated cells                                           | -0.14 | 1.04  | -0.64 | -0.38 | 0.18  | 0.21  |
| Club cells                                               | -0.28 | -0.70 | -0.59 | -0.27 | 0.24  | 0.86  |
| Goblet cells                                             | -0.10 | -1.70 | 0.20  | -0.62 | -0.03 | -0.05 |
| Alveolar type 2                                          | -0.20 | -0.25 | NA    | NA    | 0.00  | 0.00  |
| Ionocytes                                                | NA    | 0.29  | 0.03  | 0.45  | NA    | 0.00  |
